# Supplementary material for: Factors influencing the integration of self-management in daily life routines in chronic conditions: a scoping review of qualitative evidence
Source: PubMed Central journal article supplement — BMJ Open. 2022 Dec 30;12(12):e066647. doi: 10.1136/bmjopen-2022-066647 (PMC9809267; doi:10.1136/bmjopen-2022-066647), 2022-12-30
Supplement: bmjopen-2022-066647supp003.pdf [file bmjopen-2022-066647supp003.pdf]

**Supplementary Table 1. Characteristics of the included studies**

| <b>Author</b>      | <b>Year</b> | <b>Country</b> | <b>Participants</b> | <b>Disease</b>                                                                                                             | <b>Method</b> | <b>Self-management activity/recommendation</b> | <b>Aim</b>                                                                                                                                            |
|--------------------|-------------|----------------|---------------------|----------------------------------------------------------------------------------------------------------------------------|---------------|------------------------------------------------|-------------------------------------------------------------------------------------------------------------------------------------------------------|
| Audulv A (25)      | 2013        | Sweden         | 21                  | Ischemic heart disease, rheumatic disease, chronic renal disease, inflammatory bowel disease, multiple sclerosis, diabetes | Qualitative   | Exercise                                       | To describe the different chronic illness self-management behavior patterns that individuals develop and maintain over time.                          |
| Bowling C. B (26)  | 2017        | US             | 30                  | Chronic kidney disease                                                                                                     | Qualitative   | Diet and others                                | To understand the relationship among factors facilitating or impeding chronic kidney disease self-management in older adults.                         |
| Corcoran K. J (27) | 2013        | Australia      | 40                  | Chronic heart failure, diabetes, chronic                                                                                   | Qualitative   | Managing symptoms                              | To identify the major disease-specific experiences of individuals living with diabetes, chronic heart failure, chronic obstructive pulmonary disease. |

|                 |      |           |    |                                                                                                                             |             |                                         |                                                                                                                                                                                                                     |
|-----------------|------|-----------|----|-----------------------------------------------------------------------------------------------------------------------------|-------------|-----------------------------------------|---------------------------------------------------------------------------------------------------------------------------------------------------------------------------------------------------------------------|
|                 |      |           |    | obstructive pulmonary disease                                                                                               |             |                                         |                                                                                                                                                                                                                     |
| Dixon A (28)    | 2009 | US        | 27 | High cholesterol, arthritis, back pain or sciatica, cancer, diabetes, heart disease, depression, other                      | Qualitative | Exercise and other                      | To explore how people with chronic conditions understand successful self-management, what barriers to self-management they face, and what strategies they employ to manage their condition and to cope with stress. |
| Duguay C (29)   | 2014 | Canada    | 11 | Hypertension, hyperlipidemia, diabetes, coronary artery disease, obesity, arthritis, chronic obstructive pulmonary disorder | Qualitative | Managing symptoms, managing medications | To describe the fundamental structure of adults' experience with multimorbidity.                                                                                                                                    |
| Fuller B.G (30) | 2010 | Australia | 99 | Older people with and without chronic heart or lung conditions                                                              | Qualitative | Exercise, managing symptoms             | To describe and understand factors which enhance and impede participation in physical activity for older adults with and without chronic illness.                                                                   |

|                  |      |        |                           |                                                          |              |                                                   |                                                                                                                                                                                                         |
|------------------|------|--------|---------------------------|----------------------------------------------------------|--------------|---------------------------------------------------|---------------------------------------------------------------------------------------------------------------------------------------------------------------------------------------------------------|
| Gardsten C (31)  | 2018 | Sweden | 11                        | Diabetes                                                 | Qualitative  | Recognizing and managing symptoms, exercise, diet | To identify perceived challenges related to self-management among recently diagnosed adults and those with longer experience of type 2 diabetes.                                                        |
| Gary R (32)      | 2006 | US     | 32                        | Diastolic heart failure                                  | Qualitative  | Diet                                              | To describe the (a) performance of self-care behaviors and (b) demographic and clinical characteristics that affected self-care practices in women with diastolic heart failure.                        |
| Haverhals L (33) | 2011 | US     | 32 patients, 2 caregivers | Older people with one or more chronic medical conditions | Qualitative  | Managing medication                               | To understand the medication self-management issues faced by older adults and caregivers that can be addressed by an electronic PHA (Personal health applications).                                     |
| Janevic M.R (34) | 2013 | US     | 25                        | Asthma plus others                                       | Mixed method | Recognizing and managing symptoms                 | To identify the self-management challenges faced by African American women with asthma and comorbidities, how they prioritize their conditions and behaviors perceived as beneficial across conditions. |
| Jerant A.F (35)  | 2005 | US     | 54                        | Diabetes, arthritis, depression, chronic heart           | Qualitative  | Managing symptoms, medication, diet               | To elicit perceived barriers to active self-management and to                                                                                                                                           |

|                     |      |        |    |                        |              |                     |                                                                                                                                                        |
|---------------------|------|--------|----|------------------------|--------------|---------------------|--------------------------------------------------------------------------------------------------------------------------------------------------------|
|                     |      |        |    | failure, asthma, other |              |                     | accessing self-management support resources.                                                                                                           |
| Majeed-Ariss R (36) | 2015 | UK     | 15 | Diabetes               | Qualitative  | Diet and others     | To explore the views of British-Pakistani women on how does having type 2 diabetes affects their identity and how does that relate to self-management. |
| Mickelson R (37)    | 2015 | US     | 30 | Heart failure          | Mixed method | Managing medication | To examine how older adult patients with heart failure use cognitive artifacts for medication management.                                              |
| Mphwanthe G (38)    | 2020 | Malawi | 39 | Diabetes               | Qualitative  | Diet, exercise      | To identify barriers, facilitators and support for diet and physical activity among adults with type 2 diabetes.                                       |
| Munce S.E (39)      | 2014 | Canada | 26 | Spinal cord injury     | Qualitative  |                     | To understand the perceived facilitators and barriers to self-management to prevent secondary complications.                                           |
| O'Connor R (40)     | 2016 | US     | 31 | Asthma                 | Qualitative  | Managing symptoms   | To understand their experience with assuming self-management roles for their asthma.                                                                   |
| Paterson B (41)     | 2001 | Canada | 22 | Diabetes               | Qualitative  |                     | To investigate self-care decision making in diabetes.                                                                                                  |

|                         |      |            |    |                                                                                                                                                                                                     |             |                             |                                                                                                                                               |
|-------------------------|------|------------|----|-----------------------------------------------------------------------------------------------------------------------------------------------------------------------------------------------------|-------------|-----------------------------|-----------------------------------------------------------------------------------------------------------------------------------------------|
| Salim H (42)            | 2021 | Malaysia   | 26 | Asthma                                                                                                                                                                                              | Qualitative | Managing symptoms           | To explore how people with limited health literacy understand asthma and undertake self-management practices.                                 |
| Steinman L (43)         | 2020 | US         | 70 | Diabetes and hypertension                                                                                                                                                                           | Qualitative | Exercise, managing symptoms | To understand the facilitators and barriers to chronic disease management and the acceptability, appropriateness, and feasibility of mHealth. |
| Van de Bovenkamp H (44) | 2017 | Netherland | 26 | Rheumatic disease, diabetes, kidney failure, glaucoma, gout, kidney transplantation, heart failure, hearing disability, vision problems, cancer, tuberculosis, immune disease, high blood pressure, | Qualitative | Managing medication         | To explore the way patient self-management is shaped in practice, including the implications of the difficulties encountered.                 |

|                 |      |             |    |                                                             |             |                        |                                                                                                                                        |
|-----------------|------|-------------|----|-------------------------------------------------------------|-------------|------------------------|----------------------------------------------------------------------------------------------------------------------------------------|
|                 |      |             |    | high cholesterol, gastric bypass surgery                    |             |                        |                                                                                                                                        |
| Williams A (45) | 2014 | Australia   | 26 | Diabetes, chronic kidney disease and cardiovascular disease | Qualitative | Managing medication    | To examine the perceptions of a group of culturally and linguistically diverse participants with the comorbidities.                    |
| Zanini C (46)   | 2018 | Switzerland | 20 | Spinal cord injury                                          | Qualitative | Managing complications | To identify styles of prevention that individuals with spinal cord injury adopt to deal with the risk of developing pressure injuries. |
