# Supplementary material for: Factors influencing the integration of self-management in daily life routines in chronic conditions: a scoping review of qualitative evidence
Source: PubMed Central journal article supplement — BMJ Open. 2022 Dec 30;12(12):e066647. doi: 10.1136/bmjopen-2022-066647 (PMC9809267; doi:10.1136/bmjopen-2022-066647), 2022-12-30
Supplement: bmjopen-2022-066647supp005.pdf [file bmjopen-2022-066647supp005.pdf]

Supplementary Table 3. Themes and subthemes

| Theme                      | Subtheme                                              | Articles contributing to the themes                                                                                                                                                                                                                                |
|----------------------------|-------------------------------------------------------|--------------------------------------------------------------------------------------------------------------------------------------------------------------------------------------------------------------------------------------------------------------------|
| <b>Environment support</b> | <i>Family and cultural norms</i>                      | <ul style="list-style-type: none"> <li>• Bowling et al.</li> <li>• Gary et al.</li> <li>• Jerant et al.</li> <li>• Majeed et al.</li> <li>• Mphwanthe et al.</li> <li>• Munce et al.</li> <li>• Williams et al.</li> </ul>                                         |
|                            | <i>Health professionals and guiding communication</i> | <ul style="list-style-type: none"> <li>• Bowling et al.</li> <li>• Dixon et al.</li> <li>• Haverhals et al.</li> <li>• Jerant et al.</li> <li>• Mickelson et al.</li> <li>• Paterson et al.</li> <li>• Van de Bovenkamp et al.</li> <li>• Zanini et al.</li> </ul> |
|                            | <i>Society and chronic disease perceptions</i>        | <ul style="list-style-type: none"> <li>• Duguay et al.</li> <li>• Mphwanthe et al.</li> <li>• Salim et al.</li> </ul>                                                                                                                                              |

|                          |                             |                                                                                                                                                                                                                                                     |
|--------------------------|-----------------------------|-----------------------------------------------------------------------------------------------------------------------------------------------------------------------------------------------------------------------------------------------------|
| <b>Comprehension gap</b> | <i>Reading the body</i>     | <ul style="list-style-type: none"><li>• Auduly et al.</li><li>• Corcoran et al.</li><li>• Fuller et al.</li><li>• Gardsten et al.</li><li>• Haverhals et al.</li><li>• Janevic et al.</li><li>• O'Connor et al.</li><li>• Steinman et al.</li></ul> |
|                          | <i>Applying information</i> | <ul style="list-style-type: none"><li>• Dixon et al.</li><li>• Gardsten et al.</li><li>• Jerant et al.</li></ul>                                                                                                                                    |
