# Supplementary figures and images for: Factors influencing the integration of self-management in daily life routines in chronic conditions: a scoping review of qualitative evidence
Source: PubMed Central journal article supplement — BMJ Open. 2022 Dec 30;12(12):e066647. doi: 10.1136/bmjopen-2022-066647 (PMC9809267; doi:10.1136/bmjopen-2022-066647), 2022-12-30

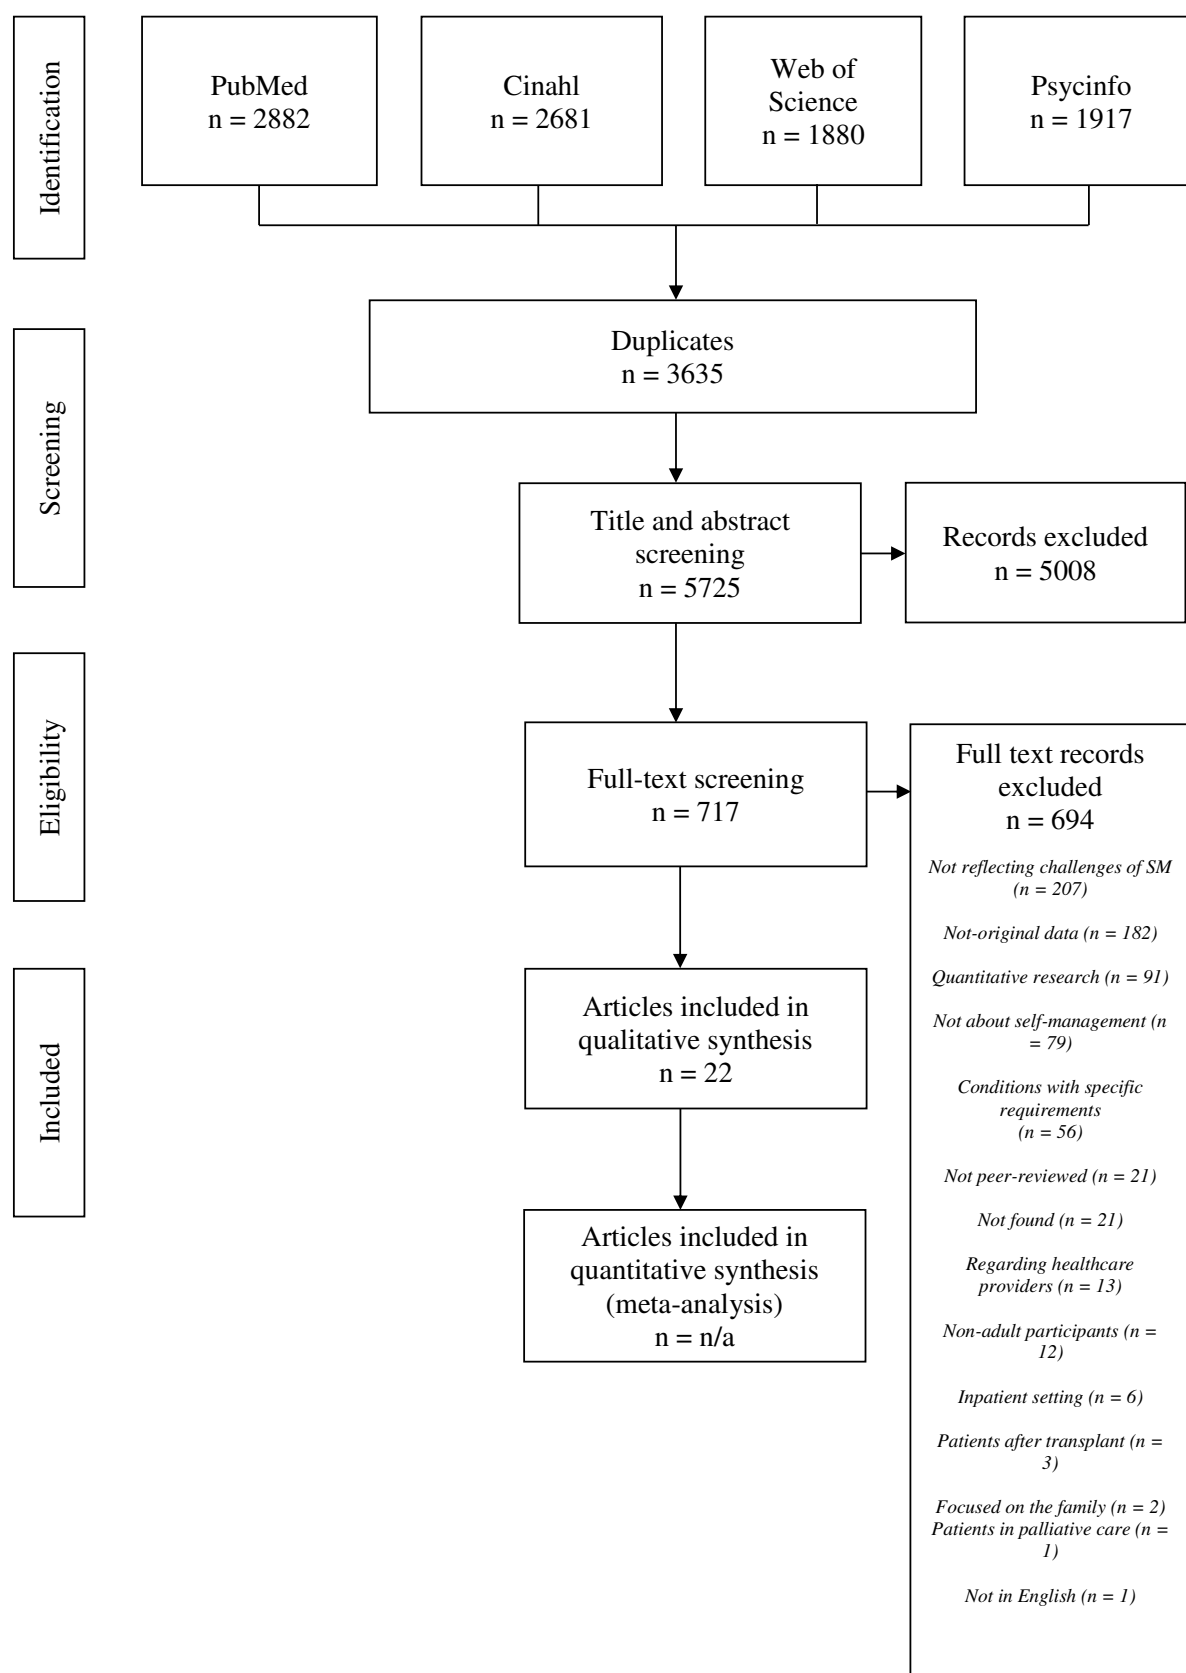

Supplementary Figure 1. Prisma flow diagram

Supplement: bmjopen-2022-066647supp002.pdf [file bmjopen-2022-066647supp002.pdf]
